# Supplementary material for: Research and Application of Kupffer Cell Thresholds for BSA Nanoparticles
Source: MDPI journal article supplement (doi:10.3390/molecules28020880), 2023-01-16
Supplement: s1 [file s1]

# Research and application of Kupffer cell threshold for BSA nanoparticles

Huanhuan Guo <sup>1†</sup>, Zongguang Tai <sup>1†</sup>, Fang Liu<sup>2†</sup>, Jing Tian <sup>1</sup>, Nan Ding <sup>1</sup>, Zhongjian Chen <sup>3, \*</sup>, and Shen Gao <sup>1, \*</sup>

<sup>1</sup> Department of Pharmacy, Changhai Hospital, Naval Medical University (Second Military Medical University), Shanghai 200433, China

<sup>2</sup> Department of Gastroenterology, Changzheng Hospital, Naval Medical University (Second Military Medical University), Shanghai 200433, China

<sup>3</sup> Shanghai Skin Disease Hospital, School of Medicine, Tongji University, Shanghai 200443, China

\* Correspondence: 1905059@tongji.edu.cn or aajian818@163.com (Z.C.); liu136256@smmu.edu.cn or liullk@126.com (S.G.); Tel.: +86-021-36803021 (Z.C.); +86-021-31162297 (S.G.)

† These authors contributed equally to this work.

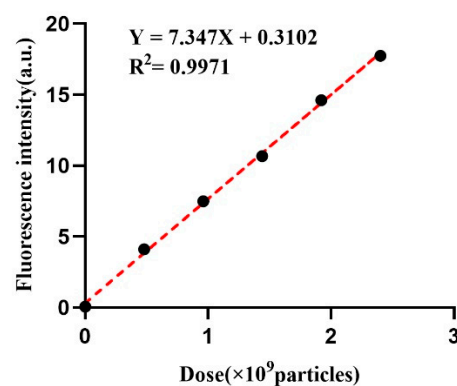

Figure S1. A standard curve corresponding to the fluorescence intensity and multiple concentrations of Nile red-labeled BSA nanoparticles (n=5).

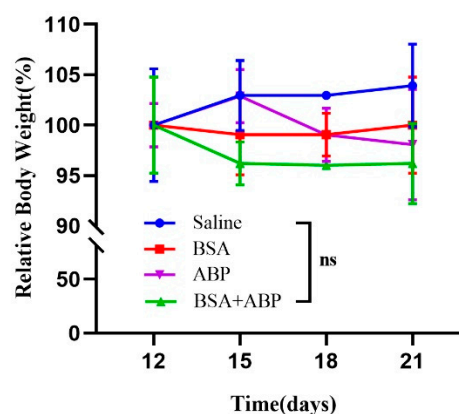

Figure S2. Comparison of relative body weight among treatment groups (n=5). ns,  $p > 0.05$ .
